# Supplementary material for: Tinnitus healthcare: a survey revealing extensive variation in opinion and practices across Europe
Source: PubMed Central journal article supplement — BMJ Open. 2020 Jan 21;10(1):e029346. doi: 10.1136/bmjopen-2019-029346 (PMC7045098; doi:10.1136/bmjopen-2019-029346), 2020-01-21
Supplement: bmjopen-2019-029346supp001.pdf [file bmjopen-2019-029346supp001.pdf]

**Supplemental information 1 : The survey**

| DEMOGRAPHICS                                                                                                                                                                                                                                                                                                                                                                                                                                                                                                                                                                                                                                                                                                                                                                                                                                            |
|---------------------------------------------------------------------------------------------------------------------------------------------------------------------------------------------------------------------------------------------------------------------------------------------------------------------------------------------------------------------------------------------------------------------------------------------------------------------------------------------------------------------------------------------------------------------------------------------------------------------------------------------------------------------------------------------------------------------------------------------------------------------------------------------------------------------------------------------------------|
| <p>1. Age</p> <p>2. Gender</p> <p>3. In which country do you reside?</p> <p>4. What is your profession? (Multiple choice). Options: GP, ENT, psychologist, psychiatrist, neurologist, audiologist, other, namely...</p> <p>5. Where do you work? (Multiple choice). Options: Public hospital, private hospital, university, university hospital, private office/practice, other, namely...</p>                                                                                                                                                                                                                                                                                                                                                                                                                                                          |
| NATIONAL HEALTH-CARE STRUCTURE                                                                                                                                                                                                                                                                                                                                                                                                                                                                                                                                                                                                                                                                                                                                                                                                                          |
| <p>6. Are there specialized tinnitus healthcare-units in your country? (yes/no)</p> <p>7. What referral pathways for tinnitus patients are typically used in your country? (Multiple choice). Options: GP, ENT, Internet, directly, hospital, psychologist, dentist, community services, other, namely...</p> <p>8. Is a consultation with GP necessary to go to a tinnitus unit/clinic/ENT/Audiological centre? (yes/no)</p>                                                                                                                                                                                                                                                                                                                                                                                                                           |
| STATUS OF THE PATIENT                                                                                                                                                                                                                                                                                                                                                                                                                                                                                                                                                                                                                                                                                                                                                                                                                                   |
| <p>9. Do you consider tinnitus to be...? (Multiple choice). Options: Symptom, disease, audiological problem, psychological problem, none of the above, other, namely...</p> <p>10. What is on average the emotional status of your patient at the moment of first consultation? (5-point Likert). Options: Very positive, somewhat positive, neutral, distressed, very distressed</p> <p>11. Do you see predominantly...? (Multiple choice). Options: Chronic tinnitus (more than 3 months), acute tinnitus (less than 3 months), both</p> <p>12. How much time can you allocate to an individual tinnitus patient in one consultation? (Multiple choice). Options: 1-10 min, 10-30 min, 30-60 min, More than 60 min</p> <p>13. How many tinnitus patients do you see in one week? (Multiple choice). Options: Less than 1, 1-5, 6-10, More than 10</p> |
| MANAGEMENT OF THE PATIENT                                                                                                                                                                                                                                                                                                                                                                                                                                                                                                                                                                                                                                                                                                                                                                                                                               |
| <p>14. Is there a protocol for tinnitus management in your country? (yes/no)</p> <p>b. If yes, how often do you use it? (5-point Likert). Options: Always, almost always, sometimes, almost never, never</p> <p>15. What disciplines most often handle tinnitus patients in your country? (Multiple choice). Options: ENT, audiology, psychology, psychiatry, physiotherapy, neurology, dentistry, other, namely...</p>                                                                                                                                                                                                                                                                                                                                                                                                                                 |

16. Is there a multidisciplinary approach to treat the tinnitus patient? (yes/no)  
b. If yes which professionals are included? (Multiple choice). Options: ENT, audiologist, psychologist, psychiatrist, physiotherapist, neurologist, dentist, other, namely...
17. Which medical/psychiatric conditions are taken into consideration when examining tinnitus patients? (Multiple choice). Options: Hypertension, diabetes, thyroid dysfunction, TMJ disorders, psychological/psychiatric disorders, hearing loss, hyperlipidaemia, dizziness, cervical disorders, migraine, allergy, other
- TREATMENT AND DIAGNOSTICS**
18. What kind of clinical department in your country treats tinnitus patients? (Multiple choice). Options: ENT, audiology, psychology, psychiatry, physiotherapy, neurology, dentistry, other, namely...
19. What are the treatments options for tinnitus patients in your center? (Multiple choice). Options: TRT, CBT, mindfulness, relaxation, coping training, counselling, medication, advise/counselling, alternative therapies, sound therapy, rTMS, neurofeedback, physiotherapy, dental procedure, other
20. What diagnostic tools do you use on a tinnitus patient? (Multiple choice). Options: Questionnaires, micro-otoscopy, tympanometry, nasal endoscopy, pure tone audiometry, high frequency audiometry (12, 16, 20 kHz), speech audiometry (hearing loss), tinnitus pitch and loudness – LDL – LMM – IR, broad band noise EP, pure tone EP, (DP)OAE, air-conduction auditory steady-state responses (AC-ASSR), EEG, CT, MRI, angio-MRI.
21. Which questionnaires do you use to assess tinnitus severity? (Multiple choice). Options: TQ, TRQ, TFI, THI, TFI, TSCH, HADS, BDI, STAI, VAS scales, Grade from 1 to 10, other, namely
22. How do your patients pay for treatment? (Multiple choice). Options: Public health, health insurance, privately, other, namely...
23. Are you satisfied with the current service provided by your healthcare-unit? (yes/no)
