# Supplementary material for: Tinnitus healthcare: a survey revealing extensive variation in opinion and practices across Europe
Source: PubMed Central journal article supplement — BMJ Open. 2020 Jan 21;10(1):e029346. doi: 10.1136/bmjopen-2019-029346 (PMC7045098; doi:10.1136/bmjopen-2019-029346), 2020-01-21
Supplement: bmjopen-2019-029346supp002.pdf [file bmjopen-2019-029346supp002.pdf]

**Supplemental Information 2: Average net monthly income per country and per region**

| n  |             | Region | n   | Percent | Income* |
|----|-------------|--------|-----|---------|---------|
| 1  | ALBANIA     | 3      | 2   | 0,3     | 370     |
| 2  | AUSTRIA     | 1      | 1   | 0,2     | 2009    |
| 3  | BELGIUM     | 1      | 54  | 8,6     | 2091    |
| 4  | CROATIA     | 3      | 2   | 0,3     | 754     |
| 5  | CYPRUS      | 2      | 2   | 0,3     | 1658    |
|    | CZECH       |        |     |         |         |
| 6  | REPUBLIC    | 3      | 68  | 10,9    | 772     |
| 7  | DENMARK     | 1      | 14  | 2,2     | 3095    |
| 8  | FINLAND     | 1      | 1   | 0,2     | 2509    |
| 9  | FRANCE      | 1      | 39  | 6,2     | 2157    |
| 10 | GERMANY     | 1      | 28  | 4,5     | 2265    |
| 11 | GREECE      | 2      | 29  | 4,6     | 947     |
| 12 | ISRAEL      | 2      | 12  | 1,9     | 1924    |
| 13 | ITALY       | 2      | 50  | 8       | 1725    |
| 14 | LITHUANIA   | 3      | 82  | 13,1    | 616     |
| 15 | MALTA       | 2      | 9   | 1,4     | 1021    |
| 16 | NETHERLANDS | 1      | 41  | 6,6     | 2263    |
| 17 | POLAND      | 3      | 19  | 3       | 677     |
| 18 | PORTUGAL    | 2      | 64  | 10,2    | 984     |
| 19 | SERBIA      | 3      | 8   | 1,3     | 377     |
| 20 | SLOVENIA    | 3      | 3   | 0,5     | 692     |
| 21 | SPAIN       | 2      | 59  | 9,4     | 1718    |
| 22 | SWEDEN      | 1      | 23  | 3,7     | 2465    |
| 23 | SWITZERLAND | 1      | 3   | 0,5     | 4760    |
| 24 | UK          | 1      | 12  | 1,9     | 2120    |
| 24 | Total       |        | 625 | 100     |         |

\* Average net monthly income

| Region | total | mean    | n  |
|--------|-------|---------|----|
| 1      | 25734 | 2573,40 | 10 |
| 2      | 9977  | 1425,29 | 7  |
| 3      | 4258  | 608,29  | 7  |
