# Supplementary material for: Tinnitus healthcare: a survey revealing extensive variation in opinion and practices across Europe
Source: PubMed Central journal article supplement — BMJ Open. 2020 Jan 21;10(1):e029346. doi: 10.1136/bmjopen-2019-029346 (PMC7045098; doi:10.1136/bmjopen-2019-029346), 2020-01-21

### Supplemental Information 3: Treatment reimbursement: How patients pay for tinnitus healthcare

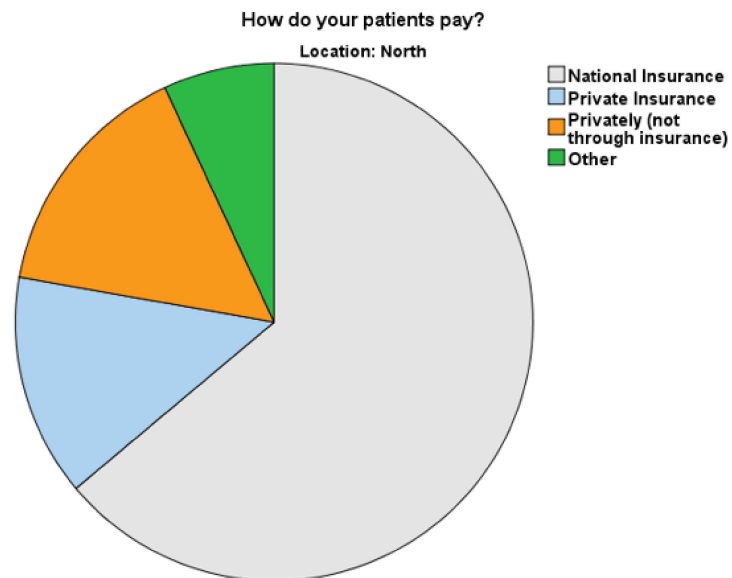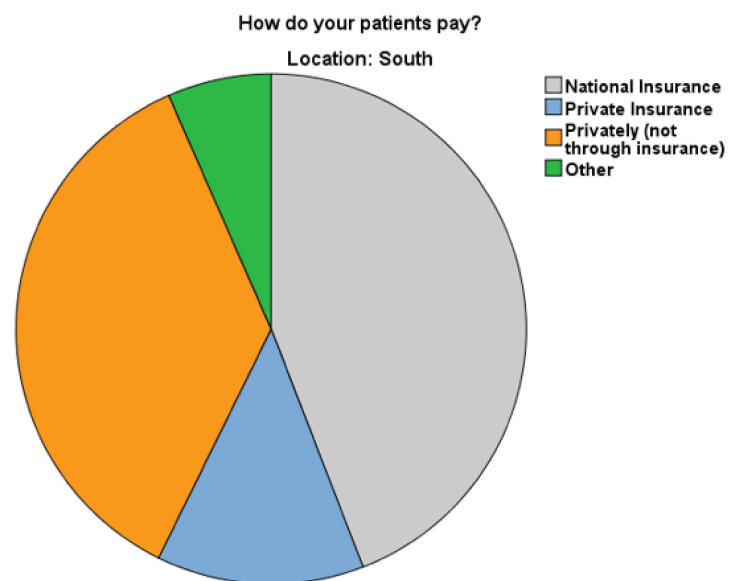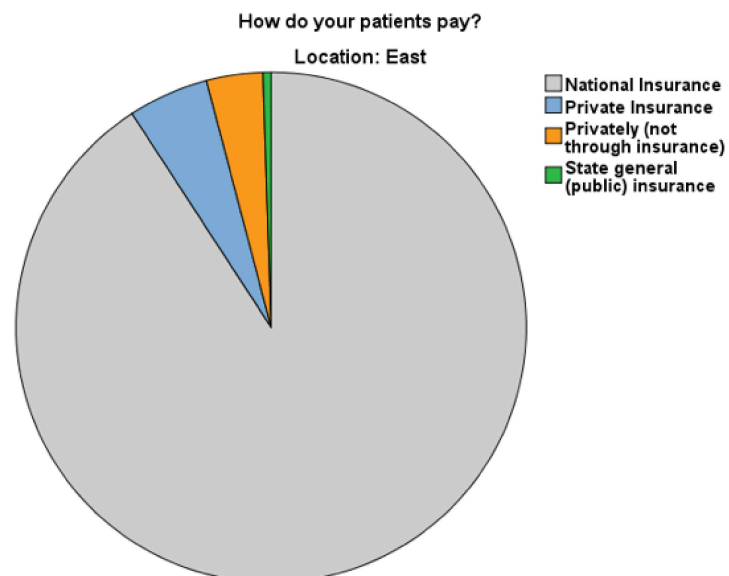

Supplement: bmjopen-2019-029346supp003.pdf [file bmjopen-2019-029346supp003.pdf]
