# Supplementary figures and images for: Tinnitus healthcare: a survey revealing extensive variation in opinion and practices across Europe
Source: PubMed Central journal article supplement — BMJ Open. 2020 Jan 21;10(1):e029346. doi: 10.1136/bmjopen-2019-029346 (PMC7045098; doi:10.1136/bmjopen-2019-029346), 2020-01-21

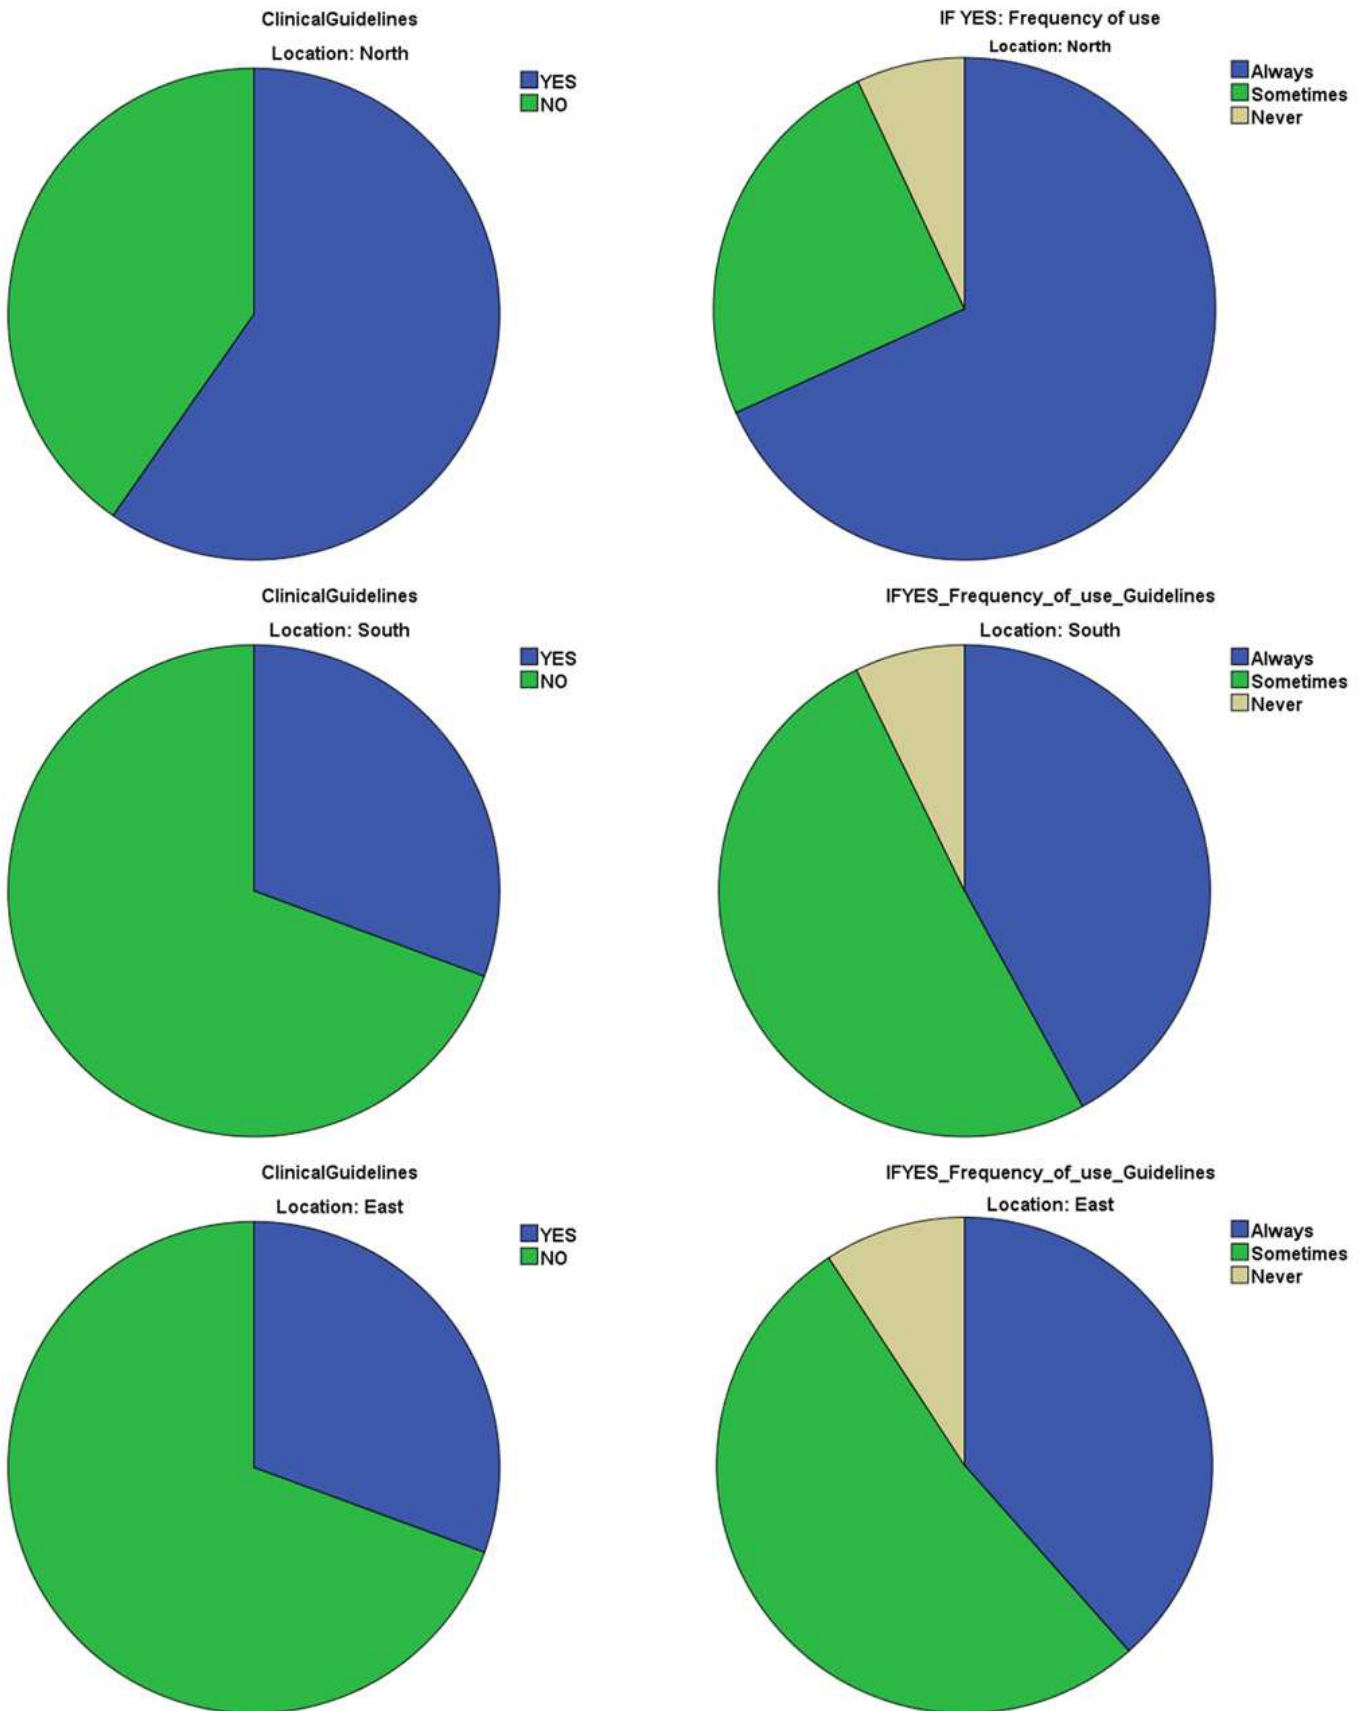

Layer 0

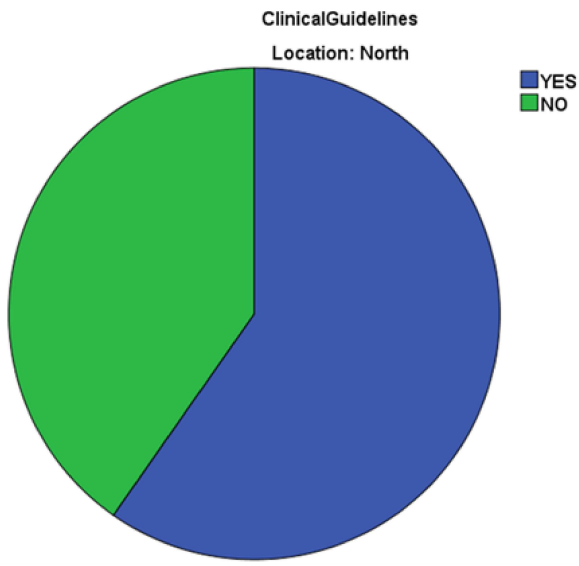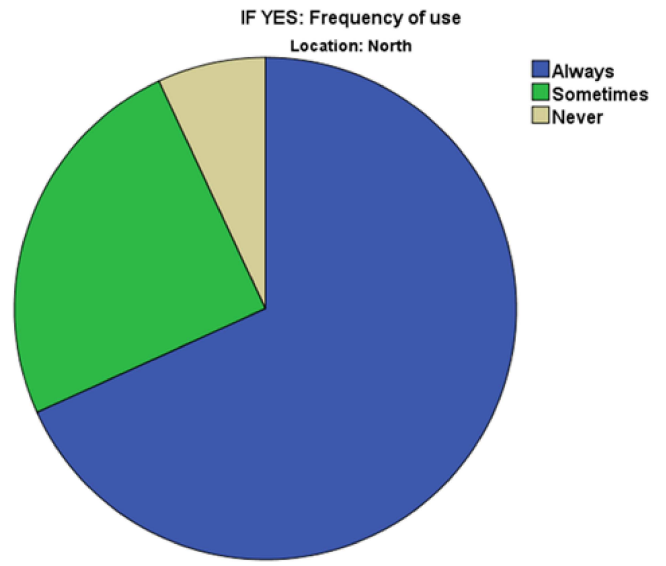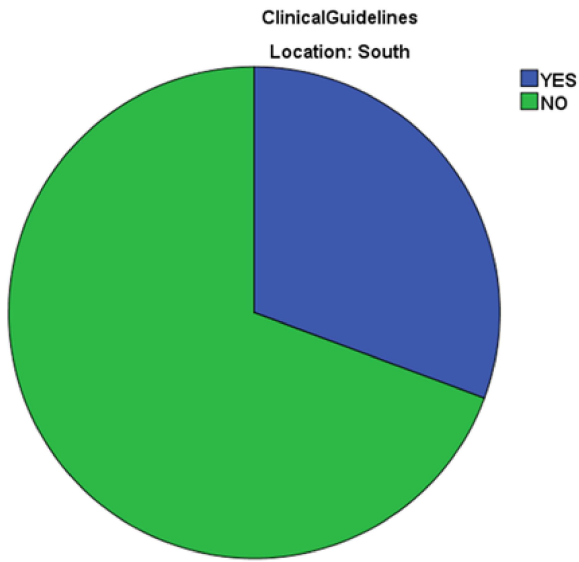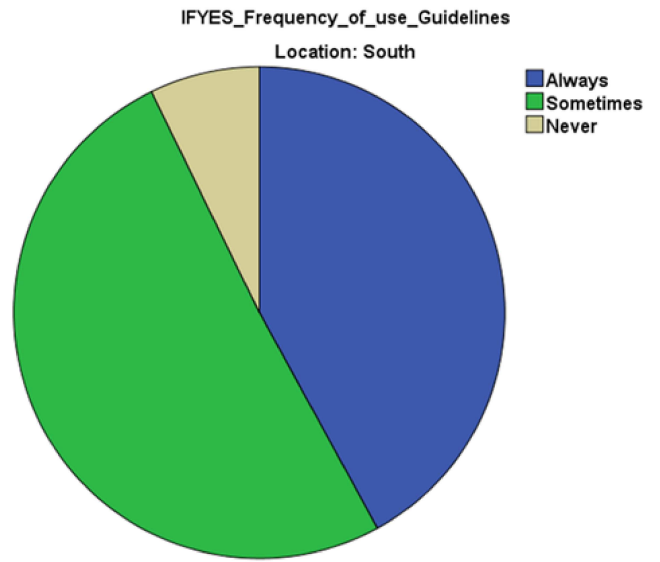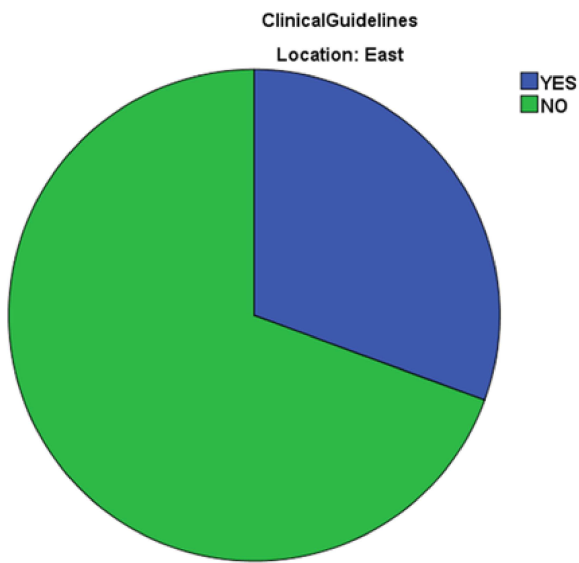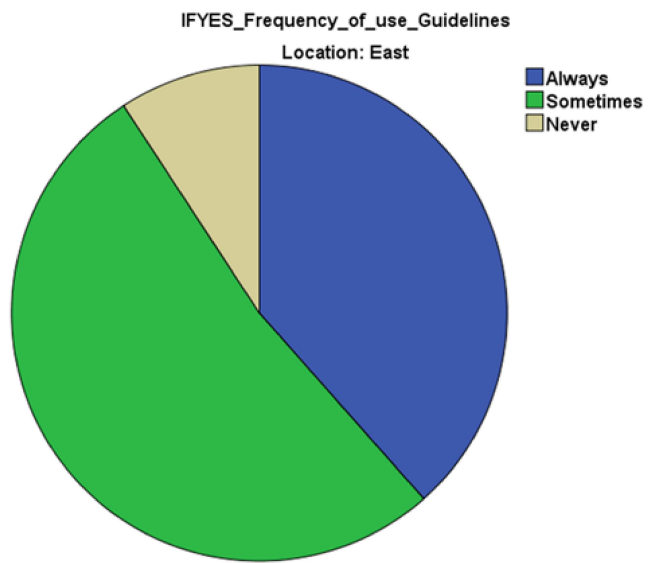

Supplement: bmjopen-2019-029346supp004.pdf [file bmjopen-2019-029346supp004.pdf]

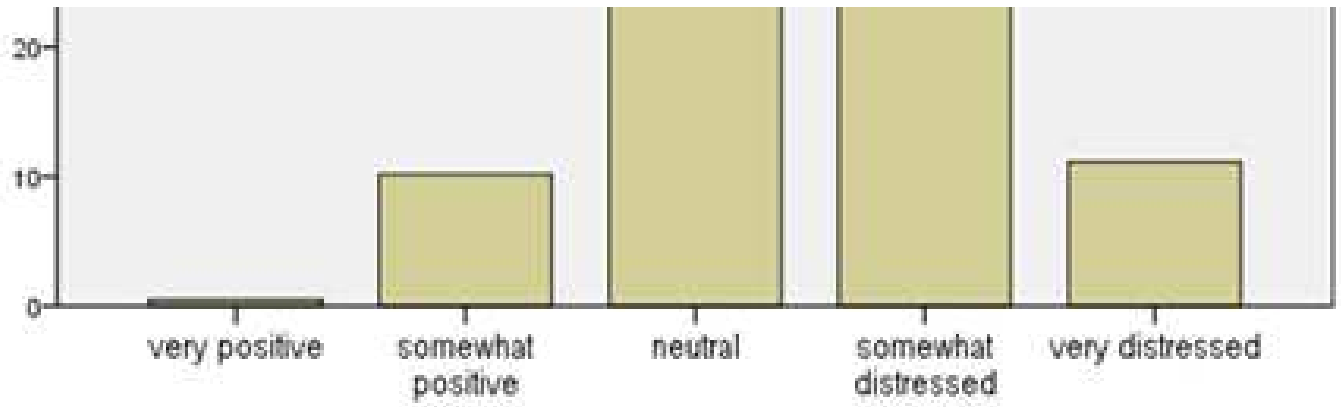

**Location: South**

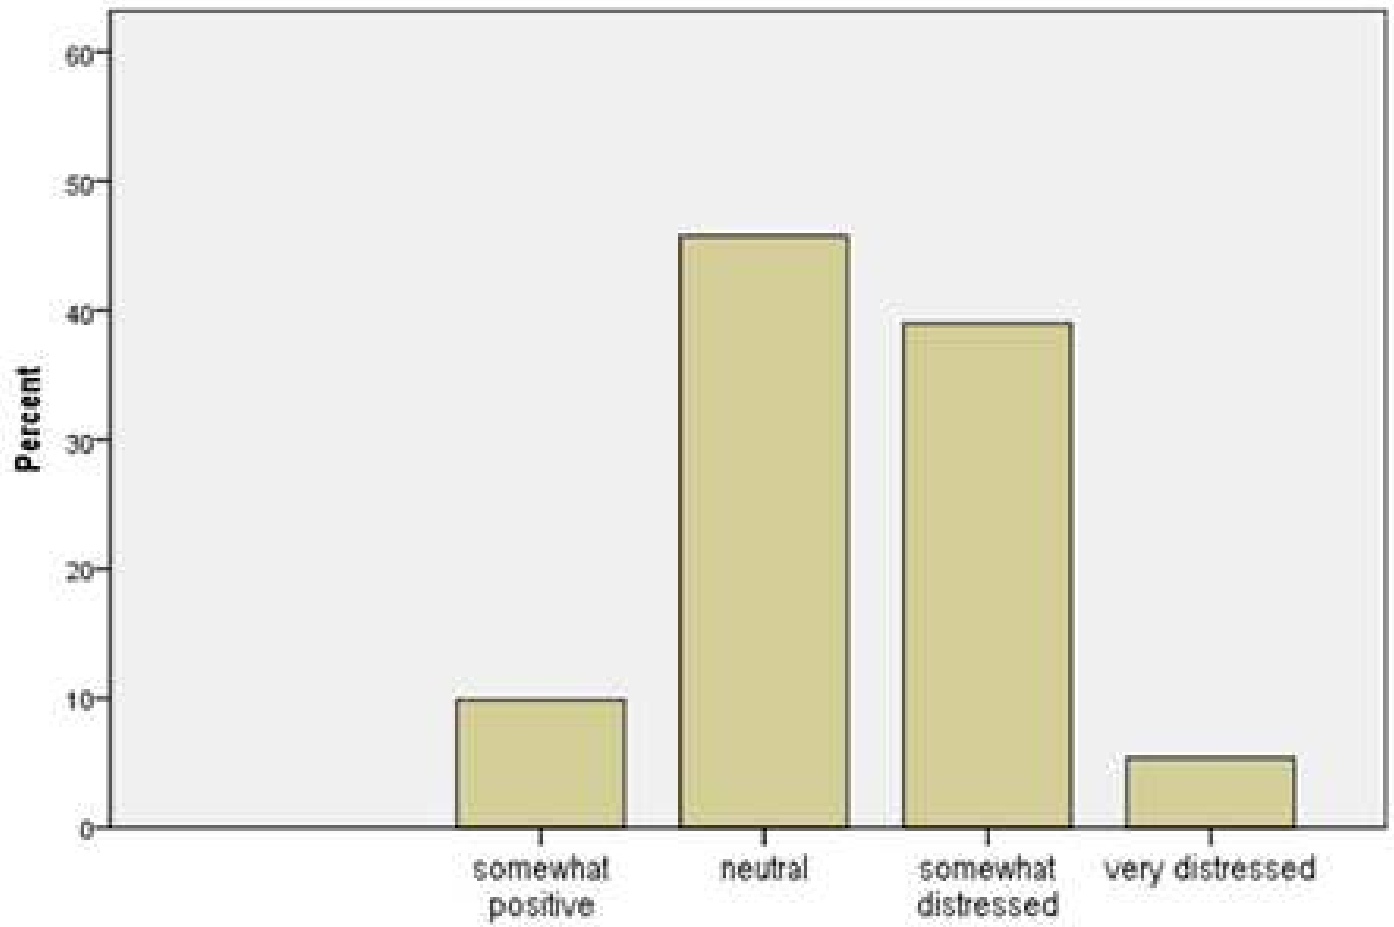

**Location: East**

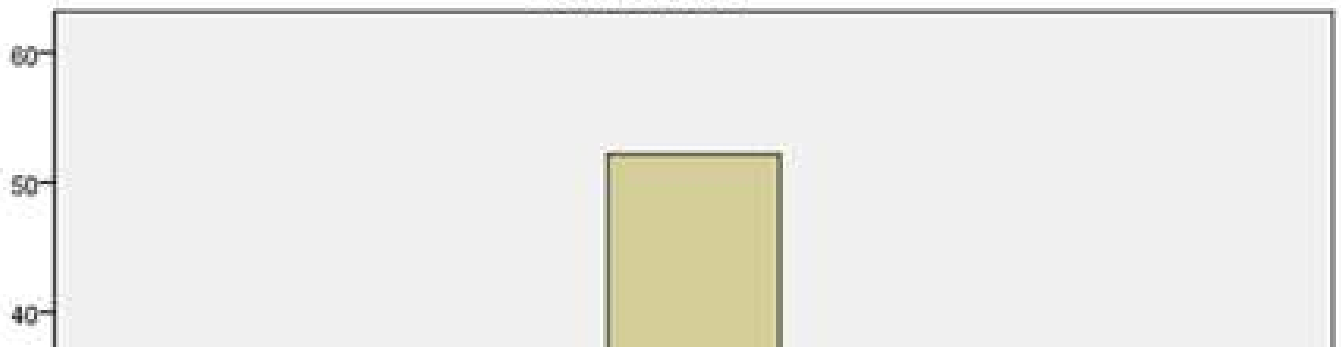

Layer 0

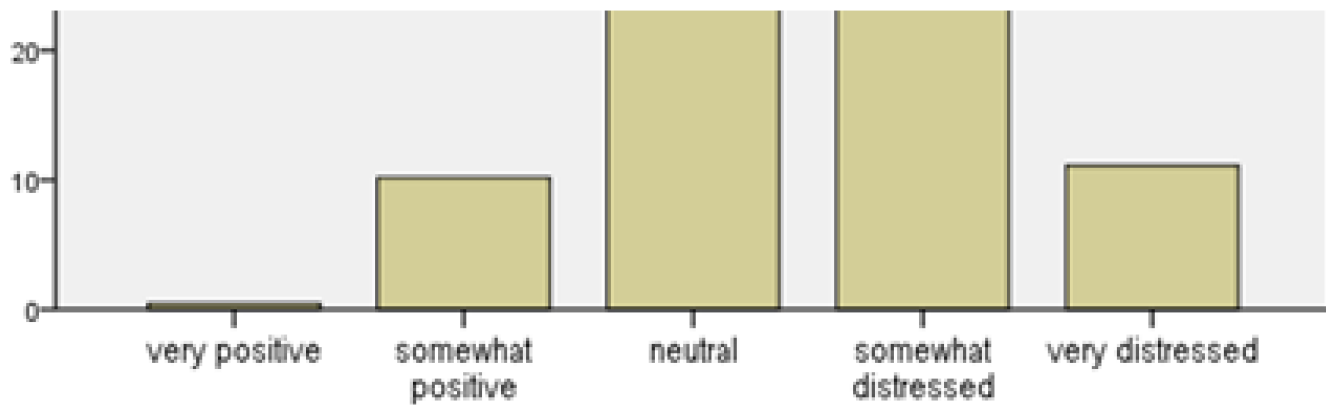

Location: South

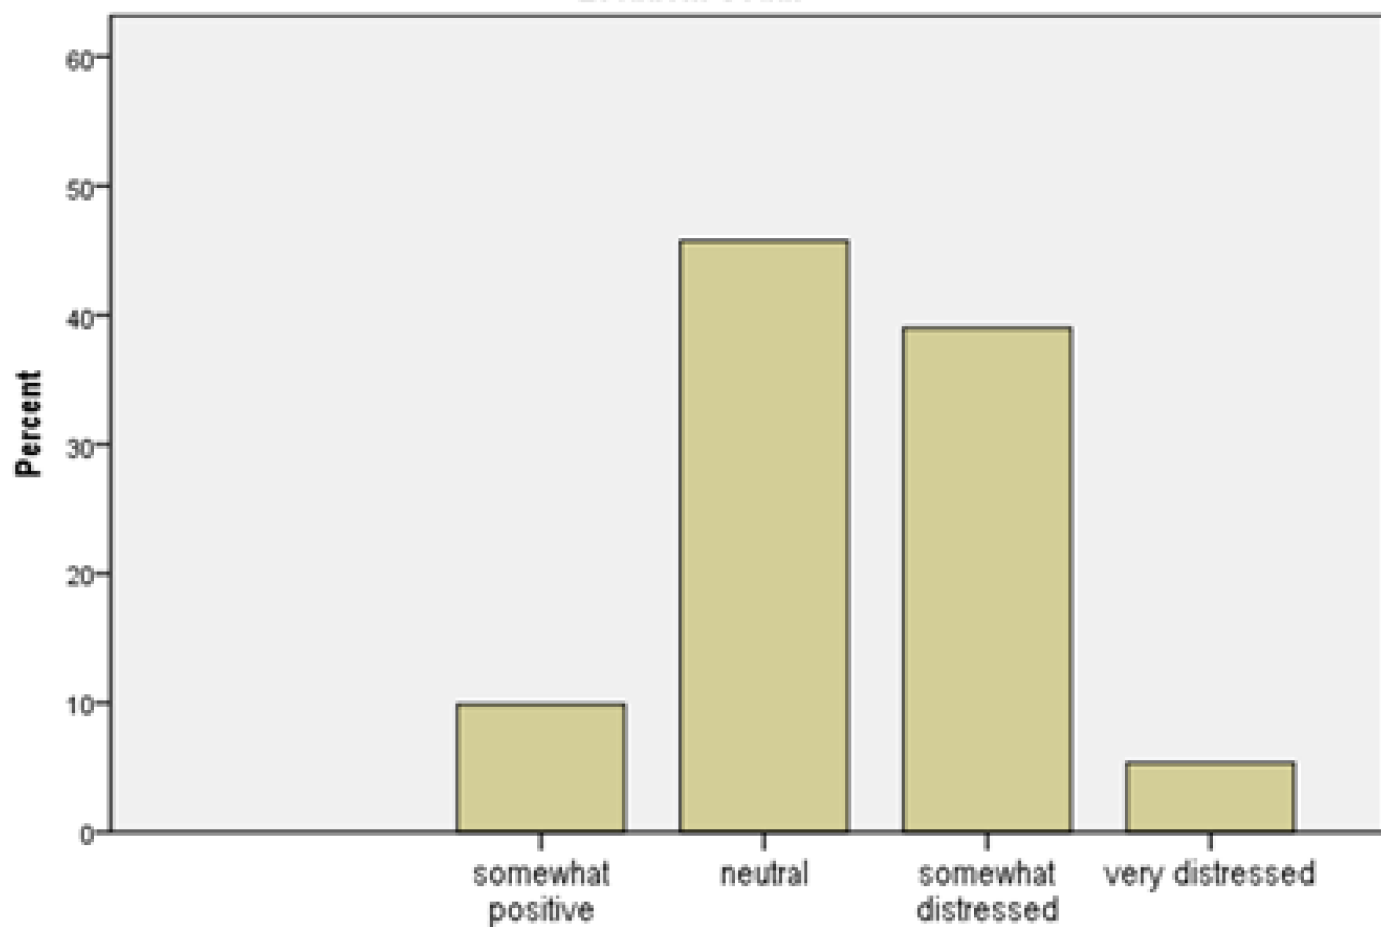

Location: East

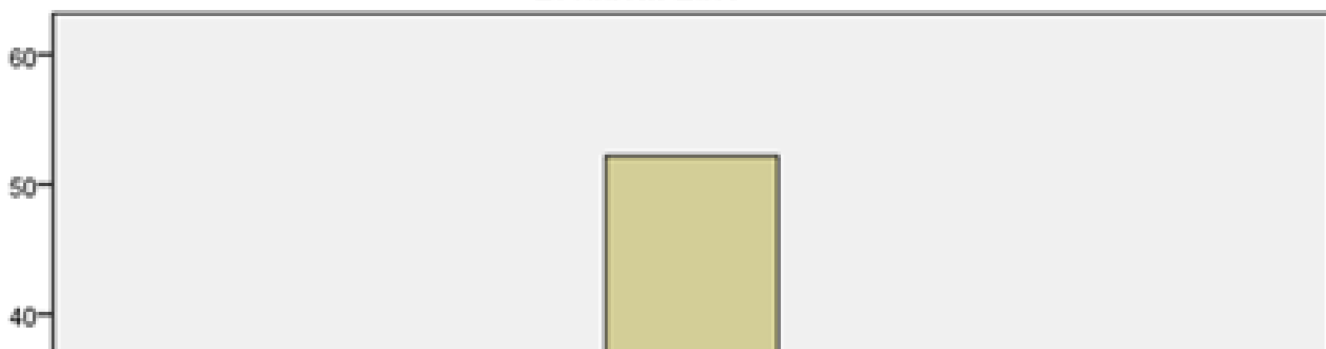

Supplement: bmjopen-2019-029346supp005.pdf [file bmjopen-2019-029346supp005.pdf]
